# Supplementary material for: Human embryonic genome activation initiates at the one-cell stage
Source: PubMed Central journal article supplement (PMC8826644; doi:10.1016/j.stem.2021.11.012), 2022-02-03
Supplement: mmc1.pdf [file mmc1.pdf]

**Cell Stem Cell, Volume 29**

**Supplemental Information**

**Human embryonic genome activation**

**initiates at the one-cell stage**

**Maki Asami, Brian Y.H. Lam, Marcella K. Ma, Kara Rainbow, Stefanie Braun, Matthew D. VerMilyea, Giles S.H. Yeo, and Anthony C.F. Perry**

# **SUPPLEMENTAL INFORMATION**

## **Human embryonic genome activation initiates at the one-cell stage**

5 Maki Asami, Brian Y. H. Lam, Marcella K. Ma, Kara Rainbow, Stefanie Braun,  
Matthew D. VerMilyea, Giles S. H. Yeo, Anthony C. F. Perry

### **This file includes:**

Legends for Figures S1 and S2

Figures S1 and S2

10 Tables S2 and S3

### **Other Supplemental Information for this manuscript includes:**

Table S1 (.xls)

### Figure S1. Human one-cell embryo expression profiles and relationships

15 (A) Volcano plot showing genes exhibiting upregulated (up), downregulated (down) and non-changing (nc) expression in one-cell embryos from scRNA-seq. Top upregulated (blue) and down regulated (pink) genes are indicated.

(B) Upregulated gene number (FDR<0.1) from scRNA-seq of one-cell embryos at each log<sub>2</sub>FC (upper bound indicated for each bin).

20 (C) Ingenuity Pathway Analysis of down-regulated gene networks (FDR<0.10) in human one-cell embryos.

(D) Venn Diagrams showing upregulated gene overlap between previous datasets from human one-cell (1C) embryo RNA-seq and RNA-seq for two-cell (2C), four-cell (4C) and eight-cell (8C) embryos (L, Leng et al., 2019; X, Xue et al., 2013; W, Wu et al., 2018). Values  
25 in parentheses show percentages of the total in one-cell embryos. Applied parameters are provided in references or applied to datasets as follows: L-1C, L-2C, L-4C, L-8C (Leng et al., 2019); X-1C ( $p_{adj}<0.06$ ,  $\log_2FC>2$ ), X-2C ( $p_{adj}<0.6$ ,  $\log_2FC>2$ ), X-4C ( $p_{adj}<1$ ,  $\log_2FC>2$ ), X-8C ( $p_{adj}<0.06$ ,  $\log_2FC>2$ ); W-2C ( $\log_2FC>1$ ), W-8C ( $\log_2FC>1$ ).

(E) Venn Diagrams showing upregulated gene overlap between human one-cell embryo  
30 scRNA-seq obtained here (FDR<0.1,  $\log_2FC>0.5$ ) and data previously reported for one-cell (1C), two-cell (2C), four-cell (4C) and eight-cell (8C) embryos (L, Leng et al., 2019; X, Xue et al., 2013; W, Wu et al., 2018) or sperm intact RNA (sperm) (Sun et al., 2021) (FDR<0.1), showing (in parentheses) percentage of the total in one-cell embryos. Comparisons were of annotated genes using parameters of (D).

35 (F) Heatmap indicating expression trajectories of 153 of the top 200 upregulated DEGs from one-cell embryos determined by scRNA-seq in this work (FDR<0.1), relative to expression in single blastomeres from two-, four- and eight-cell embryos (Leng et al., 2019). Genes were sorted into three clusters (I, II, and III) as indicated.

See also Figure 1 and Table S1.

40

**Figure S2. Differential gene expression networks in human one-cell embryos**

(A) Histograms derived from scRNA-seq showing endogenous retrovirus (*hERV*) loci upregulated in human one-cell embryos. Locus coordinates are shown on the x-axis.

45 (B) Histograms derived from scRNA-seq showing endogenous retrovirus (*hERV*) loci down-regulated in human one-cell embryos. Locus coordinates are given on the x-axis.

(C) Pie chart showing functional classes of upregulated DEGs (FDR<0.10) related to molecular mechanisms of cancer (Ingenuity).

(D) Upstream transcription activators predicted by Ingenuity Pathway Analysis (IPA) of upregulated DEGs in human one-cell embryos (FDR<0.10).

50 (E-H) Upstream transcription regulators and associated networks inferred by IPA of upregulated gene networks (FDR<0.10) in human one-cell embryos for RABL6 (E), FOXM1 (F), YAP1 (G) and TP53 (H).

(I) Genes in the E2F4 cluster identified by IPA.

See also Figure 2 and Table S1.

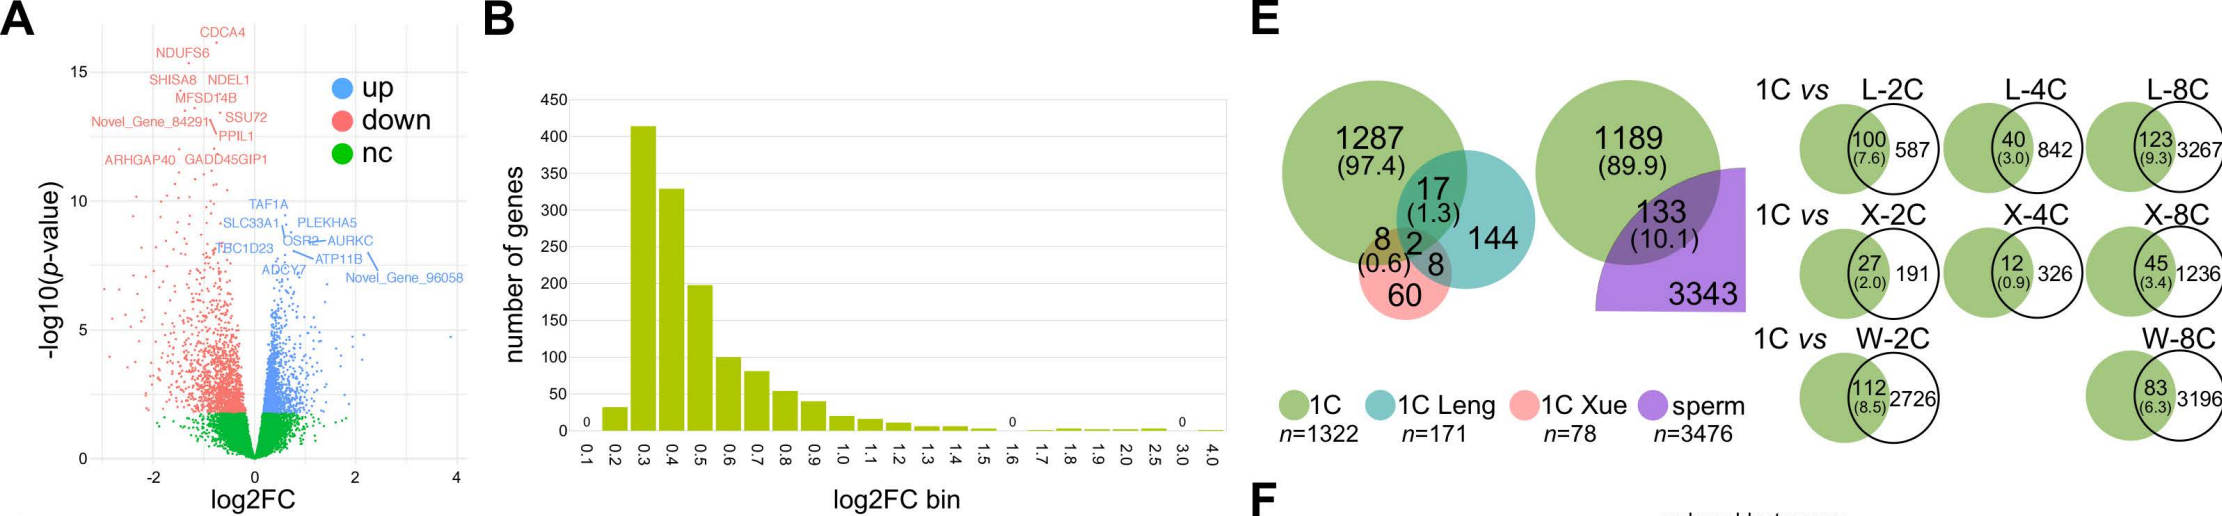

**Figure S1**  
Asami et al.

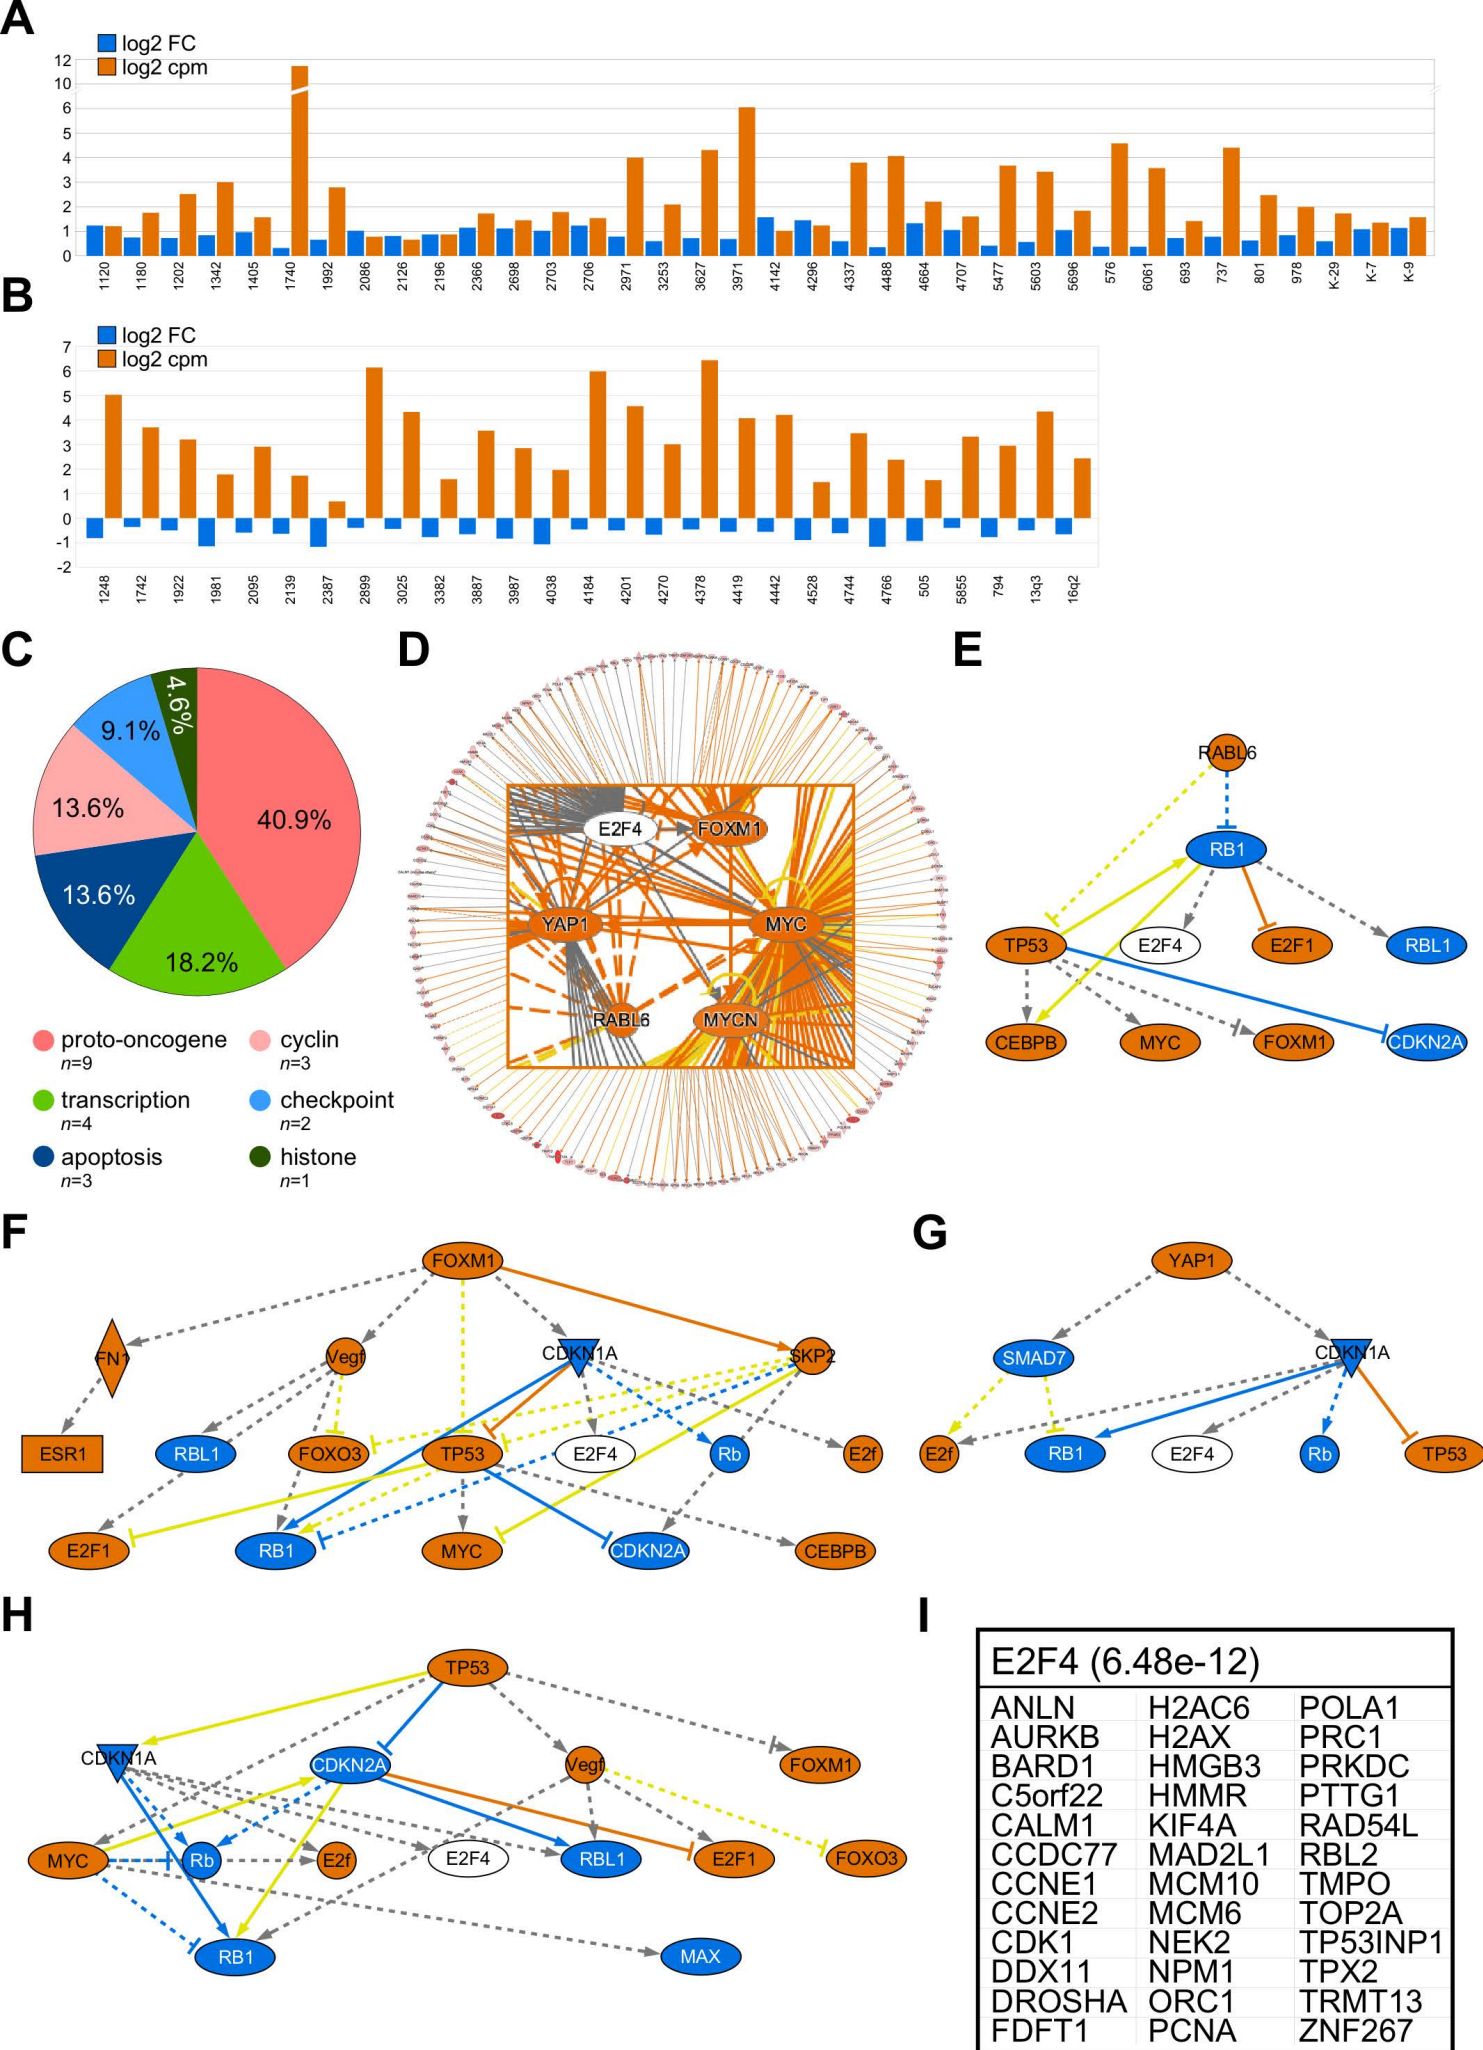

**Figure S2**  
Asami et al

---

**Table S2 PCR Primers used in this work, related to Figures 1 and 2**

---

| Sequence | Forward (5'→3')         | Reverse (5'→3')          |
|----------|-------------------------|--------------------------|
| H3F3A    | ACAAAAGCCGCTCGCAAGAGTG  | TTTCTCGCACCCAGACGCTGGAA  |
| CDH15    | AGCGTATCCGAGAACCACAAGC  | CTGGATGCTGTAGATGACGCTG   |
| TAF1A    | TCTGTGCTCAGTGGTGCAGGAA  | TGCCATTGGTGCTTCAGCAGAG   |
| ZCCHC8   | TTTCCAGCAGCGATACCACGCA  | GGAAGACTCTTGTCTGTCACACC  |
| AIF1L    | CCTTCCAGAAAAGCTCACAGCC  | CTTCATCTCCAGGTGGGTCTTG   |
| TXNIP    | CAGCAGTGCAAACAGACTTCGG  | CTGAGGAAGCTCAAAGCCGAAC   |
| TIGD5    | GTGCTGTTCCCTGTCCAAAGGCA | AGGACACAGCCAGTCGCAGCA    |
| CMTR2    | CTGACCACTCTTGAAACGGTG   | GACTTCGGAGTTTCCTGCCTTG   |
| RIPK4    | CTGAAACCGAGGACCTGTGTGA  | GCTGTAGTCGTTATCGAAGGTGG  |
| OPRM1    | CGTCAGAACTAGAGACCACC    | CTTGGTGAAGGTCGGAATGGCA   |
| RAP2C    | GAGCAGTTTGCCTCCATGAGAG  | CCTACTAGGATTAGTGGGACTTTT |
| PIAS3    | TGGTGATGAGTTTCCGGGT     | GGAAAGCGTCGTCGGTAA       |
| UGDH     | TGTGATGGTGCCCATGCTGTTG  | GTCCATCGAAGATAAAGGCTGGC  |
| NFKBIA   | TCCACTCCATCCTGAAGGCTAC  | CAAGGACACCAAAGCTCCACG    |
| CCNE1    | TGTGTCCTGGATGTTGACTGCC  | CTCTATGTCGCACCACTGATACC  |

---

**Table S3 Human embryos used in this work**

| #  | Patient | Sample | Analysis | Ethnicity                 | Age (yr) | Yield (nM) | Useable reads         | Normalization factor (TMM) | Genes detected ( $\geq 1$ cpm) |
|----|---------|--------|----------|---------------------------|----------|------------|-----------------------|----------------------------|--------------------------------|
| 1  | 1       | 2PN    | RNAseq   | Asian                     | nd       | 61.7       | 68635512              | 0.9692079                  | 15709                          |
| 2  | 1       | 2PN    | RNAseq   | Asian                     | nd       | 60.8       | 65181145              | 0.9699501                  | 15601                          |
| 3  | 1       | 2PN    | RNAseq   | Asian                     | nd       | 48.8       | 88623885              | 0.9031541                  | 15732                          |
| 4  | 2       | 2PN    | RNAseq   | Caucasian                 | nd       | 31.2       | 46084528              | 1.001886                   | 15726                          |
| 5  | 2       | 2PN    | RNAseq   | Caucasian                 | nd       | 3.1        | Amplification failure | nd                         | nd                             |
| 6  | 3       | 2PN    | RNAseq   | Caucasian                 | nd       | 54.8       | 67065772              | 0.981549                   | 15763                          |
| 7  | 4       | 2PN    | RNAseq   | Caucasian                 | nd       | 52.9       | 76729549              | 0.957278                   | 15630                          |
| 8  | 4       | 2PN    | RNAseq   | Caucasian                 | nd       | 46.2       | 76189001              | 0.944969                   | 15762                          |
| 9  | 4       | 2PN    | RNAseq   | Caucasian                 | nd       | 51.6       | 73264323              | 0.9851035                  | 15918                          |
| 10 | 5       | 2PN    | RNAseq   | Caucasian                 | nd       | 43.7       | 75180066              | 0.9368282                  | 15767                          |
| 11 | 5       | 2PN    | RNAseq   | Caucasian                 | nd       | 46.6       | 73222174              | 0.9957537                  | 15831                          |
| 12 | 6       | 2PN    | RNAseq   | Caucasian                 | nd       | 67.1       | 66404656              | 0.9754091                  | 15753                          |
| 13 | 6       | 2PN    | RNAseq   | Caucasian                 | nd       | 43.5       | 58715420              | 0.9919022                  | 15602                          |
| 14 | 7       | mII    | RNAseq   | Caucasian                 | nd       | 46.7       | 72657324              | 0.9876494                  | 15585                          |
| 15 | 7       | mII    | RNAseq   | Caucasian                 | nd       | 15.4       | Excluded outlier      | nd                         | nd                             |
| 16 | 8       | mII    | RNAseq   | Caucasian                 | nd       | 66.1       | 65324304              | 1.0415315                  | 15825                          |
| 17 | 8       | mII    | RNAseq   | Caucasian                 | nd       | 52.2       | 72466449              | 1.0608596                  | 15885                          |
| 18 | 9       | mII    | RNAseq   | Caucasian                 | <30      | 72.5       | Excluded outlier      | nd                         | nd                             |
| 19 | 9       | mII    | RNAseq   | Caucasian                 | <30      | 25.2       | 54705074              | 1.0171751                  | 15455                          |
| 20 | 10      | mII    | RNAseq   | Caucasian                 | 24.5     | 68.2       | 51126979              | 1.0306027                  | 15860                          |
| 21 | 10      | mII    | RNAseq   | Caucasian                 | 24.5     | 57.8       | 55244789              | 1.026353                   | 15818                          |
| 22 | 11      | mII    | RNAseq   | African American/Hispanic | 31       | 94.2       | 67438079              | 1.0240237                  | 15812                          |
| 23 | 11      | mII    | RNAseq   | African American/Hispanic | 31       | 97.4       | 61061212              | 1.0471581                  | 15985                          |
| 24 | 12      | mII    | RNAseq   | Caucasian                 | 22.5     | 46.3       | 69363653              | 1.0382324                  | 15837                          |



|    |    |     |        |                              |      |      |          |           |       |
|----|----|-----|--------|------------------------------|------|------|----------|-----------|-------|
| 25 | 12 | mII | RNAseq | Caucasian                    | 22.5 | 70.1 | 65550194 | 1.0569761 | 15920 |
| 26 | 13 | mII | RNAseq | Caucasian                    | 25   | 21.1 | 67377209 | 1.0439114 | 15942 |
| 27 | 13 | mII | RNAseq | Caucasian                    | 25   | 35.8 | 54760799 | 1.0324617 | 15977 |
| 28 | 7  | mII | qPCR   | Caucasian                    | nd   |      |          |           |       |
| 29 | 7  | mII | qPCR   | Caucasian                    | nd   |      |          |           |       |
| 30 | 11 | mII | qPCR   | African<br>American/Hispanic | 31   |      |          |           |       |
| 31 | 8  | mII | qPCR   | Caucasian                    | nd   |      |          |           |       |
| 32 | 10 | mII | qPCR   | Caucasian                    | 24.5 |      |          |           |       |
| 33 | 1  | 2PN | qPCR   | Asian                        | nd   |      |          |           |       |
| 34 | 1  | 2PN | qPCR   | Asian                        | nd   |      |          |           |       |
| 35 | 1  | 2PN | qPCR   | Asian                        | nd   |      |          |           |       |
| 36 | 1  | 2PN | qPCR   | Asian                        | nd   |      |          |           |       |
| 37 | 1  | 2PN | qPCR   | Asian                        | nd   |      |          |           |       |
| 38 | 5  | 2PN | qPCR   | Caucasian                    | nd   |      |          |           |       |
| 39 | 14 | 2PN | qPCR   | Unknown                      | nd   |      |          |           |       |
| 40 | 15 | 3PN | qPCR   | Unknown                      | nd   |      |          |           |       |
| 41 | 16 | 3PN | qPCR   | Unknown                      | nd   |      |          |           |       |
| 42 | 3  | 3PN | qPCR   | Caucasian                    | nd   |      |          |           |       |
| 43 | 17 | 1PN | qPCR   | Unknown                      | nd   |      |          |           |       |
| 44 | 15 | 1PN | qPCR   | Unknown                      | nd   |      |          |           |       |
| 45 | 18 | 1PN | qPCR   | Unknown                      | nd   |      |          |           |       |

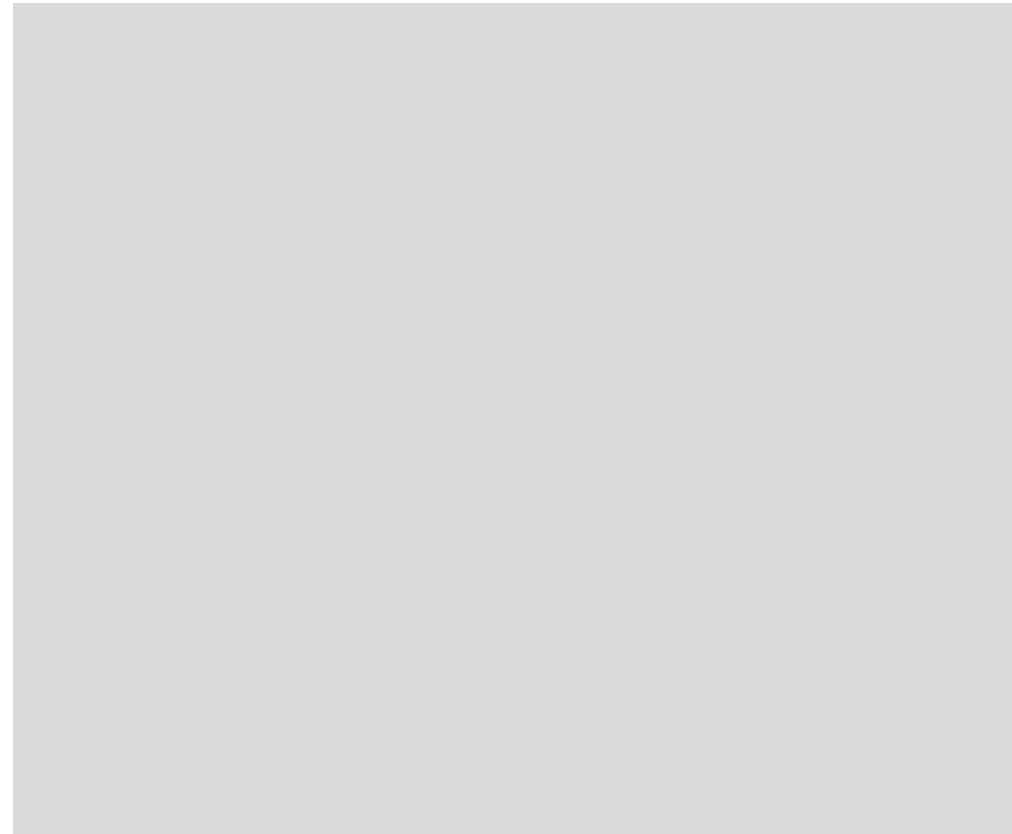

Abbreviations: 1PN, 2PN, 3PN, respectively monopronuclear, bipronuclear and tripronuclear human one-cell embryos; nd, no data; TMM, trim-mean of M-values; cpm, counts per million.
